# Supplementary material for: Early Detection of Fusarium oxysporum Infection in Processing Tomatoes (Solanum lycopersicum) and Pathogen–Soil Interactions Using a Low-Cost Portable Electronic Nose and Machine Learning Modeling
Source: MDPI journal article supplement (doi:10.3390/s22228645), 2022-11-09
Supplement: s1 [file s1]

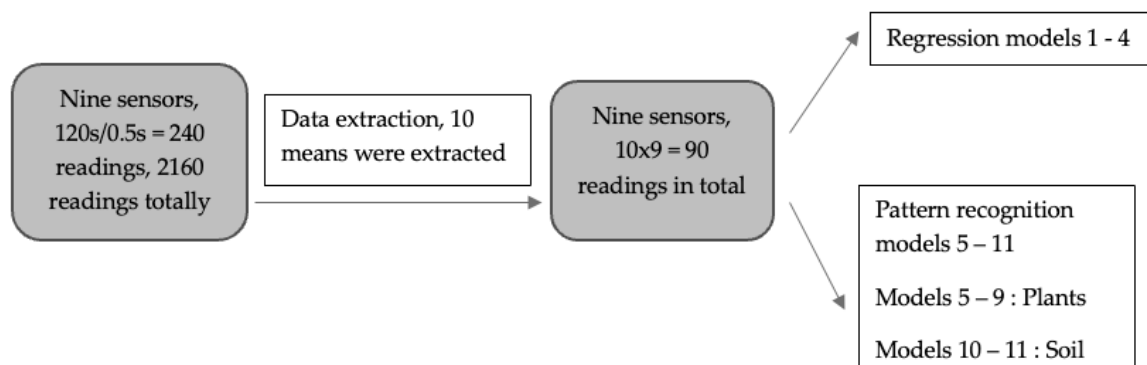

**Figure S1.** Simplified flowchart showing e-nose data acquisition and processing for each individual plant.
